# Supplementary material for: Effect of season and sunlight on viral kinetics during hepatitis C virus therapy
Source: PubMed Central journal article supplement — BMJ Open Gastroenterol. 2017 Mar 4;4(1):e000115. doi: 10.1136/bmjgast-2016-000115 (PMC5353279; doi:10.1136/bmjgast-2016-000115), 2017-03-04
Supplement: bmjgast-2016-000115supp_tables.pdf [file bmjgast-2016-000115supp_tables.pdf]

Table 1 supplementary.

Multivariate logistic analysis with HCV RNA as a continuous variable.

|                                              | <i>Rapid viral response</i> |               |          | <i>Undetectable or VL<math>\leq</math>15 UI</i> |               |          |
|----------------------------------------------|-----------------------------|---------------|----------|-------------------------------------------------|---------------|----------|
|                                              | <i>OR</i>                   | <i>CI 95%</i> | <i>P</i> | <i>OR</i>                                       | <i>CI 95%</i> | <i>P</i> |
| Treatment initiation (Season A vs. Season B) | 1.93                        | 1.22-3.07     | 0.005    | 1.81                                            | 1.08-3.04     | 0.025    |
| Type of therapy (lead-in no vs. yes)         | 23.41                       | 10.57-51.86   | <0.001   | 67.94                                           | 37.76-122.25  | <0.001   |
| HCV RNA (IU ml <sup>-1</sup> )               | 1.00                        | 1.00-1.00     | 0.712    | 1.00                                            | 1.00-1.00     | 0.181    |
| IL-28 polymorphism (CC vs. no CC)            | 1.85                        | 1.09-3.12     | 0.021    | 2.09                                            | 1.11-3.93     | 0.021    |
| Naïve vs. experienced                        | 1.49                        | 0.89-2.52     | 0.128    | 0.70                                            | 0.39-1.23     | 0.215    |
| Genotype (1b vs. 1a)                         | 1.38                        | 0.76-2.48     | 0.284    | 0.79                                            | 0.42-1.48     | 0.471    |
| Diabetes Mellitus (no vs. yes)               | 1.30                        | 0.64-2.64     | 0.461    | 1.52                                            | 0.72-3.18     | 0.272    |
| Age ( $\geq$ 50 vs. < 50 years)              | 0.94                        | 0.57-1.54     | 0.806    | 1.06                                            | 0.61-1.84     | 0.837    |
| Fibrosis ( $\geq$ F3 vs. <F3)                | 0.91                        | 0.51-1.64     | 0.762    | 1.62                                            | 0.80-3.26     | 0.004    |

Table 2 supplementary. Multivariate logistic analysis including relapsers in the naive group.

|                                              | <i>Rapid viral response</i> |               |          | <i>Undetectable or VL≤15 UI</i> |               |          |
|----------------------------------------------|-----------------------------|---------------|----------|---------------------------------|---------------|----------|
|                                              | <i>OR</i>                   | <i>CI 95%</i> | <i>P</i> | <i>OR</i>                       | <i>CI 95%</i> | <i>P</i> |
| Treatment initiation (Season A vs. Season B) | 1.96                        | 1.23-3.12     | <0.001   | 1.74                            | 1.03-2.94     | 0.038    |
| Type of therapy (lead-in no vs. yes)         | 24.16                       | 10.85-53.75   | 0.004    | 64.76                           | 35.99-116.56  | <0.001   |
| HCV RNA (IU ml <sup>-1</sup> )               | 1.00                        | 1.00-1.00     | 0.713    | 1.00                            | 1.00-1.00     | 0.263    |
| IL-28 polymorphism (CC vs. no CC)            | 1.81                        | 1.07-3.04     | 0.026    | 1.92                            | 1.02-3.63     | 0.043    |
| Naïve+relapsers vs. experienced              | 1.11                        | 0.68-1.81     | 0.663    | 0.41                            | 0.24-0.69     | 0.001    |
| Genotype (1b vs. 1a)                         | 1.38                        | 0.77-2.48     | 0.279    | 0.77                            | 0.41-1.45     | 0.430    |
| Diabetes Mellitus (no vs. yes)               | 1.32                        | 0.65-2.67     | 0.434    | 1.52                            | 0.71-3.22     | 0.279    |
| Age (≥ 50 vs. < 50 years)                    | 0.89                        | 0.55-1.46     | 0.662    | 1.12                            | 0.64-1.96     | 0.686    |
| Fibrosis (≥F3 vs. <F3)                       | 0.93                        | 0.52-1.67     | 0.82     | 1.55                            | 0.77-3.12     | 0.223    |
